# Supplementary material for: Timing of WIC Enrollment and Responsive Feeding among Low-Income Women in the US
Source: MDPI journal article supplement (doi:10.3390/ijerph18147695), 2021-07-20
Supplement: s1 [file s1]

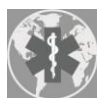

**Table S1.** Response rates of the analysis sample by study time point ( $n = 3777$ ).

| Interview | % ( $n$ )    |
|-----------|--------------|
| Prenatal  | 70.1 (2,649) |
| Month 1   | 90.0 (3,398) |
| Month 3   | 76.3 (2,881) |
| Month 5   | 69.8 (2,636) |
| Month 7   | 83.0 (3,134) |
| Month 9   | 64.9 (2,451) |
| Month 11  | 61.5 (2,322) |
| Month 13  | 74.3 (2,807) |

**Table S2.** Timing of WIC enrollment and odds ratios (95% confidence intervals) of responsive feeding in WIC ITFPS-2<sup>a</sup>.

|                                      | Responsive feeding<br>OR |
|--------------------------------------|--------------------------|
|                                      | ( $n = 1667$ )           |
| Prenatal WIC enrollment <sup>b</sup> | 1.81 **<br>[1.18, 2.79]  |
| Food security                        |                          |
| High or marginal                     | Ref.                     |
| Low                                  | 1.01<br>[0.76, 1.33]     |
| Very low                             | 1.26<br>[0.88, 1.81]     |
| Age at childbirth                    |                          |
| 16–19 years                          | Ref.                     |
| 20–25 years                          | 0.73<br>[0.47, 1.15]     |
| 26 years or older                    | 0.99<br>[0.63, 1.54]     |
| Race                                 |                          |
| White                                | Ref.                     |
| Black                                | 0.90<br>[0.63, 1.29]     |
| All other                            | 1.34<br>[0.96, 1.86]     |
| Hispanic                             | 1.37*<br>[1.05, 1.81]    |
| Married                              | 1.40*<br>[1.04, 1.86]    |
| Education                            |                          |
| < High school                        | Ref.                     |

|                                 |                       |
|---------------------------------|-----------------------|
| > High school                   | 0.90<br>[0.68, 1.18]  |
| % of poverty guideline          |                       |
| 75% or less                     | Ref.                  |
| 75% - 130%                      | 1.08<br>[0.81, 1.44]  |
| Above 130%                      | 1.04<br>[0.65, 1.65]  |
| Number of children in household | 0.97<br>[0.87, 1.09]  |
| Work status                     |                       |
| No work                         | Ref.                  |
| Full/part time work             | 1.40*<br>[1.08, 1.81] |

95% confidence intervals in brackets \*  $p < 0.05$ , \*\*  $p < 0.01$ . <sup>a</sup> Responsive feeding was coded as equal to 0 (i.e. nonresponsive feeding) if the woman reported feeding the infant on schedule or both on schedule and on demand during any of the included interviews. Responsive feeding was coded as equal to 1 if the woman reported feeding on demand (i.e. when the infant cries or seems hungry). Weights were used in all analyses (WCM1\_3\_13LCOR). Infants who had feeding abnormalities as reported in any interview were excluded. <sup>b</sup> Timing of WIC enrollment was recorded at baseline when women enrolled in WIC for the first time for their current pregnancy. Feeding on demand was derived from data from the 9 -, 11-, and 13 - month interviews. OR: odds ratio; WIC: The Special Supplemental Nutrition Program for Women, Infants, and Children.
